# Supplementary material
Source: publisher figshare collection journal article supplement (https://tandf.figshare.com/articles/dataset/_/19620895)
Supplement: Supplementary file 1 [file 1]

***Figure 1 Supplementary***. Cytotoxic, proliferative and migratitive effects of NGF and CHF on C6 cells.


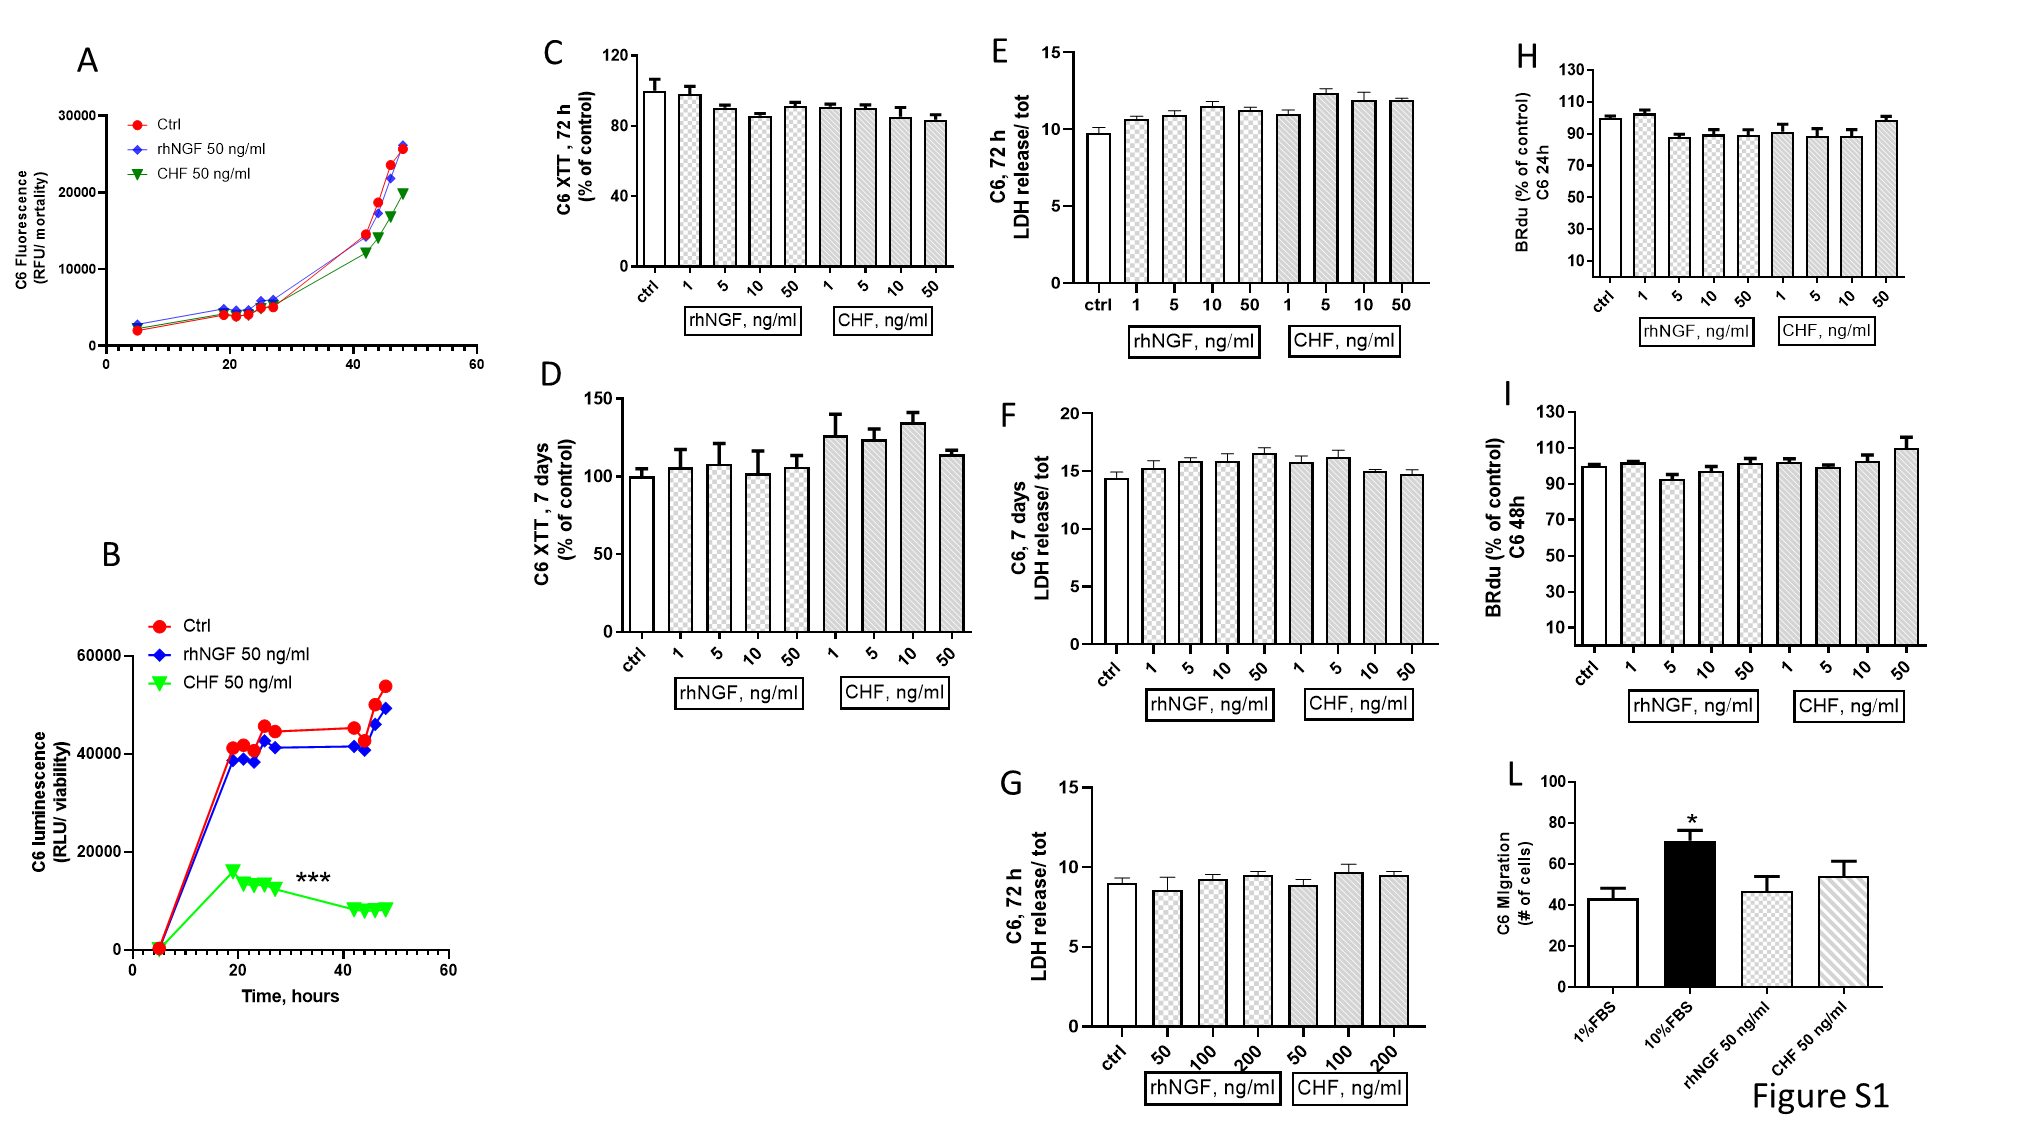


Panel A and B show real-time monitoring of C6 viability/mortality after administration of 50 ng/ml of NGF and CHF. Panel C (at 72h) and D (at 7 days) show long-term cytotoxicity effects after administration of NGF or CHF different concentrations (1-5-10-50 ng/ml). Panel E (at 72 h), F (at 7 days) and G (72h, higher doses) show C6 cellular damage after administration of NGF or CHF. Panel H (at 24h) and I (at 48h) show newly sinthetized C6 cell after NGF or CHF administration. Panel L show evaluation of C6 cellular migration after NGF or CHF administration. The comparison between CHF and NGF, both given in the range 1-50 ng/ml or higher concentrations, showed no differences The data are expressed as average ± SEM of 6 replicates for group. One-way ANOVA analysis was carried out.
